# Supplementary material for: A megaplasmid family driving dissemination of multidrug resistance in Pseudomonas
Source: PubMed Central journal article supplement (PMC7070040; doi:10.1038/s41467-020-15081-7), 2020-03-13
Supplement: 41467_2020_15081_MOESM3_ESM.pdf [file 41467_2020_15081_MOESM3_ESM.pdf]

## Description of Additional Supplementary Files

File Name: Supplementary Data 1

Description: General features of the Thailand clinical isolates and their genome sequences

File Name: Supplementary Data 2

Description: pBT2436 and pBT2101 genome annotation

File Name: Supplementary Data 3

Description: Functional annotation of the pBT2436-like family accessory genome

File Name: Supplementary Data 4

Description: List of megaplasmid relatives identified in *Pseudomonas* genomes from the GenBank assembly database and their associated metadata
